# Supplementary material for: Constructing Fe2O3 nanoparticles in nitrogen-doped carbon materials to enhance the electrochemical sensing performance of Pb2+ and Cd2+
Source: Royal Society of Chemistry journal article supplement (doi:10.1039/d3dt01664a), 2023-01-01
Supplement: d3dt01664a1.pdf [file d3dt01664a1.pdf]

## Supporting Information

### **Constructing Fe<sub>2</sub>O<sub>3</sub> Nanoparticles in Nitrogen-Doped Carbon Materials to Enhance the Electrochemical Sensing Performance of Pb<sup>2+</sup> and Cd<sup>2+</sup>**

Shiya Wu<sup>a</sup>, Renliang Lyu<sup>a</sup> (Co-first author), Wei Xiong<sup>a,\*</sup>, Xiujing Xing<sup>b</sup>, and Hao Li<sup>c,\*</sup>

*<sup>a</sup> Key Laboratory of Novel Biomass-Based Environmental and Energy Materials in Petroleum and Chemical Industry, Engineering Research Center of Phosphorus Resources Development and Utilization of Ministry of Education, Hubei Key Laboratory of Novel Reactor & Green Chemical Technology, School of Chemistry and Environmental Engineering, Wuhan Institute of Technology, Wuhan 430205, China*

*<sup>b</sup> Chemistry Department, University of California, Davis 95616 United States*

*<sup>c</sup> Advanced Institute for Materials Research (WPI-AIMR), Tohoku University, Sendai 980-8577, Japan*

---

\*Corresponding author

E-mail address: xiongwei@wit.edu.cn (W. X.); li.hao.b8@tohoku.ac.jp (H. L.)

Tel/Fax: +86-27-87195001; +81-080-9363-8256

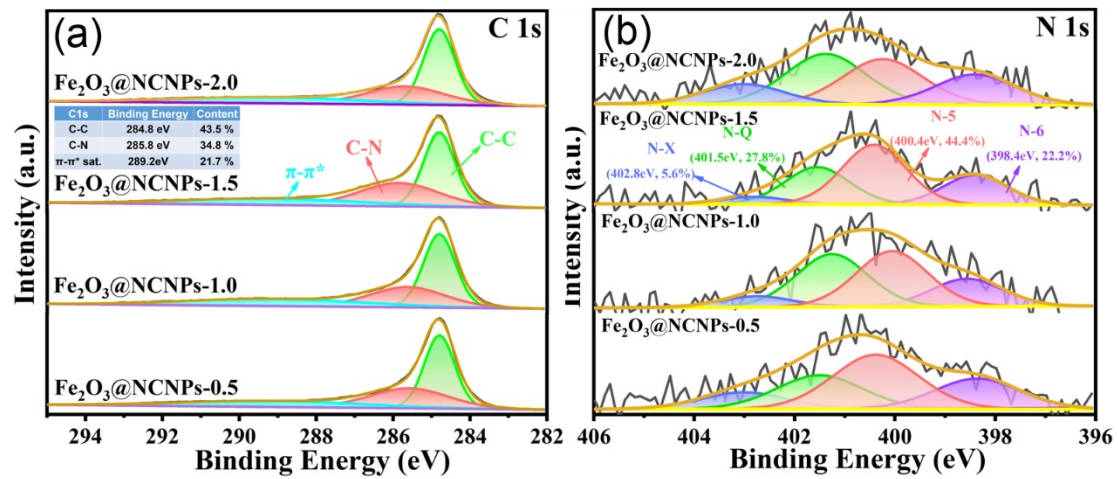

Fig. S1 High resolution (a) C 1s and (b) N 1s XPS spectrum of Fe<sub>2</sub>O<sub>3</sub>@NCNPs-x.

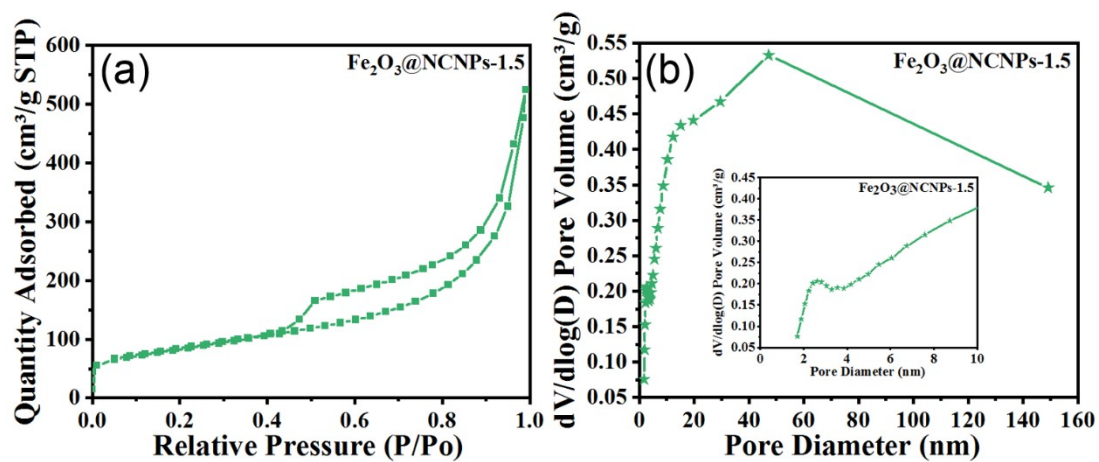

**Fig. S2** (a) the N<sub>2</sub> adsorption/desorption isotherm and (b) the pore-size distribution of Fe<sub>2</sub>O<sub>3</sub>@NCNPs-1.5 nanomaterial.

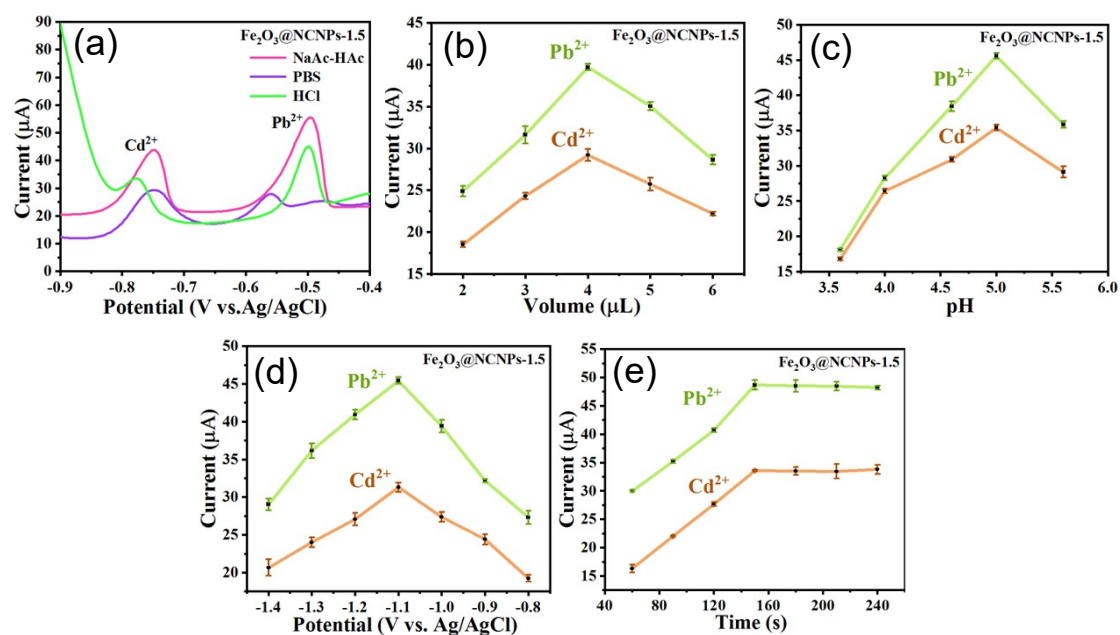

**Fig. S3** Investigation of optimal experimental conditions: the influence of (a) supporting electrolytes, (b) modified volume, (c) pH values, (d) deposition potential, and (e) deposition time on the current response of the  $\text{Fe}_2\text{O}_3@\text{NCNPs-1.5}/\text{GCE}$ . The error bars represented the standard deviations of triple measurements.

**Table S1** The curve fitting information of C 1s for Fe<sub>2</sub>O<sub>3</sub>@NCNPs-n.

| C-C                                       |                     |      |       |
|-------------------------------------------|---------------------|------|-------|
| Sample                                    | Binding Energy (eV) | FWHM | %Area |
| Fe <sub>2</sub> O <sub>3</sub> @NCNPs-0.5 | 284.8               | 0.9  | 45.5  |
| Fe <sub>2</sub> O <sub>3</sub> @NCNPs-1.0 | 284.8               | 0.9  | 45.5  |
| Fe <sub>2</sub> O <sub>3</sub> @NCNPs-1.5 | 284.8               | 0.9  | 43.5  |
| Fe <sub>2</sub> O <sub>3</sub> @NCNPs-2.0 | 284.8               | 0.9  | 48.1  |
| C-N                                       |                     |      |       |
| Sample                                    | Binding Energy (eV) | FWHM | %Area |
| Fe <sub>2</sub> O <sub>3</sub> @NCNPs-0.5 | 285.6               | 2.4  | 31.8  |
| Fe <sub>2</sub> O <sub>3</sub> @NCNPs-1.0 | 285.6               | 2.3  | 29.5  |
| Fe <sub>2</sub> O <sub>3</sub> @NCNPs-1.5 | 285.8               | 2.4  | 34.8  |
| Fe <sub>2</sub> O <sub>3</sub> @NCNPs-2.0 | 285.7               | 2.4  | 28.8  |
| $\pi$ - $\pi^*$ satellite                 |                     |      |       |
| Sample                                    | Binding Energy (eV) | FWHM | %Area |
| Fe <sub>2</sub> O <sub>3</sub> @NCNPs-0.5 | 289.2               | 5.5  | 22.7  |
| Fe <sub>2</sub> O <sub>3</sub> @NCNPs-1.0 | 289.1               | 5.4  | 25.0  |
| Fe <sub>2</sub> O <sub>3</sub> @NCNPs-1.5 | 289.2               | 5.5  | 21.7  |
| Fe <sub>2</sub> O <sub>3</sub> @NCNPs-2.0 | 289.2               | 5.5  | 23.1  |

**Table S2** The curve fitting information of N 1s for Fe<sub>2</sub>O<sub>3</sub>@NCNPs-n.

| N-6                                       |                |      |       |
|-------------------------------------------|----------------|------|-------|
| Sample                                    | Binding Energy | FWHM | %Area |
| Fe <sub>2</sub> O <sub>3</sub> @NCNPs-0.5 | 398.4          | 1.9  | 22.5  |
| Fe <sub>2</sub> O <sub>3</sub> @NCNPs-1.0 | 398.6          | 1.7  | 18.9  |
| Fe <sub>2</sub> O <sub>3</sub> @NCNPs-1.5 | 398.4          | 1.6  | 22.2  |
| Fe <sub>2</sub> O <sub>3</sub> @NCNPs-2.0 | 398.4          | 1.9  | 20.7  |
| N-5                                       |                |      |       |
| Sample                                    | Binding Energy | FWHM | %Area |
| Fe <sub>2</sub> O <sub>3</sub> @NCNPs-0.5 | 400.4          | 1.9  | 40.0  |
| Fe <sub>2</sub> O <sub>3</sub> @NCNPs-1.0 | 400.1          | 1.7  | 37.7  |
| Fe <sub>2</sub> O <sub>3</sub> @NCNPs-1.5 | 400.4          | 1.6  | 44.4  |
| Fe <sub>2</sub> O <sub>3</sub> @NCNPs-2.0 | 400.2          | 1.9  | 31.0  |
| N-Q                                       |                |      |       |
| Sample                                    | Binding Energy | FWHM | %Area |
| Fe <sub>2</sub> O <sub>3</sub> @NCNPs-0.5 | 401.5          | 1.9  | 25.0  |
| Fe <sub>2</sub> O <sub>3</sub> @NCNPs-1.0 | 401.3          | 1.7  | 35.9  |
| Fe <sub>2</sub> O <sub>3</sub> @NCNPs-1.5 | 401.5          | 1.6  | 27.8  |
| Fe <sub>2</sub> O <sub>3</sub> @NCNPs-2.0 | 401.4          | 1.9  | 34.5  |
| N-X                                       |                |      |       |
| Sample                                    | Binding Energy | FWHM | %Area |
| Fe <sub>2</sub> O <sub>3</sub> @NCNPs-0.5 | 403.0          | 1.9  | 12.5  |
| Fe <sub>2</sub> O <sub>3</sub> @NCNPs-1.0 | 402.8          | 1.7  | 7.5   |
| Fe <sub>2</sub> O <sub>3</sub> @NCNPs-1.5 | 402.8          | 1.6  | 5.6   |
| Fe <sub>2</sub> O <sub>3</sub> @NCNPs-2.0 | 403.0          | 1.9  | 13.8  |

**Table S3** The curve fitting information of **O 1s** for Fe<sub>2</sub>O<sub>3</sub>@NCNPs-n.

| Fe-O                                      |                     |      |       |
|-------------------------------------------|---------------------|------|-------|
| Sample                                    | Binding Energy (eV) | FWHM | %Area |
| Fe <sub>2</sub> O <sub>3</sub> @NCNPs-0.5 | 530.5               | 1.3  | 34.2  |
| Fe <sub>2</sub> O <sub>3</sub> @NCNPs-1.0 | 530.6               | 1.3  | 31.3  |
| Fe <sub>2</sub> O <sub>3</sub> @NCNPs-1.5 | 530.3               | 1.5  | 33.3  |
| Fe <sub>2</sub> O <sub>3</sub> @NCNPs-2.0 | 530.6               | 1.4  | 33.3  |
| OVs                                       |                     |      |       |
| Sample                                    | Binding Energy (eV) | FWHM | %Area |
| Fe <sub>2</sub> O <sub>3</sub> @NCNPs-0.5 | 531.9               | 1.6  | 37.5  |
| Fe <sub>2</sub> O <sub>3</sub> @NCNPs-1.0 | 531.8               | 1.7  | 34.4  |
| Fe <sub>2</sub> O <sub>3</sub> @NCNPs-1.5 | 532.2               | 1.8  | 41.7  |
| Fe <sub>2</sub> O <sub>3</sub> @NCNPs-2.0 | 531.9               | 1.7  | 30.0  |
| O <sub>2</sub>                            |                     |      |       |
| Sample                                    | Binding Energy (eV) | FWHM | %Area |
| Fe <sub>2</sub> O <sub>3</sub> @NCNPs-0.5 | 533.1               | 1.3  | 19.8  |
| Fe <sub>2</sub> O <sub>3</sub> @NCNPs-1.0 | 533.0               | 1.3  | 25.0  |
| Fe <sub>2</sub> O <sub>3</sub> @NCNPs-1.5 | 533.0               | 1.5  | 20.8  |
| Fe <sub>2</sub> O <sub>3</sub> @NCNPs-2.0 | 533.0               | 1.4  | 26.7  |
| H-O-H                                     |                     |      |       |
| Sample                                    | Binding Energy (eV) | FWHM | %Area |
| Fe <sub>2</sub> O <sub>3</sub> @NCNPs-0.5 | 534.4               | 1.4  | 8.5   |
| Fe <sub>2</sub> O <sub>3</sub> @NCNPs-1.0 | 534.4               | 1.4  | 9.3   |
| Fe <sub>2</sub> O <sub>3</sub> @NCNPs-1.5 | 534.8               | 1.5  | 4.2   |
| Fe <sub>2</sub> O <sub>3</sub> @NCNPs-2.0 | 534.3               | 1.4  | 10.0  |

**Table S4** The curve fitting information of Fe 2*p* for Fe<sub>2</sub>O<sub>3</sub>@NCNPs-*n*.

| Fe 2 <i>p</i> <sub>3/2</sub> -Fe <sup>2+</sup> |                |      |       |
|------------------------------------------------|----------------|------|-------|
| Sample                                         | Binding Energy | FWHM | %Area |
| Fe <sub>2</sub> O <sub>3</sub> @NCNPs-0.5      | 710.6          | 1.5  | 22.1  |
| Fe <sub>2</sub> O <sub>3</sub> @NCNPs-1.0      | 710.5          | 1.5  | 19.2  |
| Fe <sub>2</sub> O <sub>3</sub> @NCNPs-1.5      | 710.4          | 1.5  | 21.7  |
| Fe <sub>2</sub> O <sub>3</sub> @NCNPs-2.0      | 710.5          | 1.6  | 14.3  |
| Fe 2 <i>p</i> <sub>3/2</sub> -Fe <sup>3+</sup> |                |      |       |
| Sample                                         | Binding Energy | FWHM | %Area |
| Fe <sub>2</sub> O <sub>3</sub> @NCNPs-0.5      | 712.6          | 1.7  | 26.5  |
| Fe <sub>2</sub> O <sub>3</sub> @NCNPs-1.0      | 712.4          | 1.7  | 28.9  |
| Fe <sub>2</sub> O <sub>3</sub> @NCNPs-1.5      | 712.4          | 1.7  | 18.1  |
| Fe <sub>2</sub> O <sub>3</sub> @NCNPs-2.0      | 712.1          | 1.8  | 32.9  |
| Fe 2 <i>p</i> <sub>1/2</sub> -Fe <sup>2+</sup> |                |      |       |
| Sample                                         | Binding Energy | FWHM | %Area |
| Fe <sub>2</sub> O <sub>3</sub> @NCNPs-0.5      | 724.1          | 1.7  | 16.2  |
| Fe <sub>2</sub> O <sub>3</sub> @NCNPs-1.0      | 723.9          | 1.7  | 11.5  |
| Fe <sub>2</sub> O <sub>3</sub> @NCNPs-1.5      | 724.2          | 1.7  | 13.3  |
| Fe <sub>2</sub> O <sub>3</sub> @NCNPs-2.0      | 723.9          | 1.8  | 9.6   |
| Fe 2 <i>p</i> <sub>1/2</sub> -Fe <sup>3+</sup> |                |      |       |
| Sample                                         | Binding Energy | FWHM | %Area |
| Fe <sub>2</sub> O <sub>3</sub> @NCNPs-0.5      | 727.0          | 1.9  | 12.9  |
| Fe <sub>2</sub> O <sub>3</sub> @NCNPs-1.0      | 726.9          | 1.8  | 16.6  |
| Fe <sub>2</sub> O <sub>3</sub> @NCNPs-1.5      | 726.8          | 1.8  | 10.2  |
| Fe <sub>2</sub> O <sub>3</sub> @NCNPs-2.0      | 726.9          | 1.8  | 18.3  |



**Table S5** The pore structure parameters of Fe<sub>2</sub>O<sub>3</sub>@NCNPs-1.5 nanomaterial.

| Fe <sub>2</sub> O <sub>3</sub> @NCNPs-1.5            |       |
|------------------------------------------------------|-------|
| S <sub>BET</sub> <sup>a</sup> (m <sup>2</sup> /g)    | 292   |
| S <sub>micro</sub> <sup>b</sup> (m <sup>2</sup> /g)  | 30    |
| V <sub>total</sub> <sup>c</sup> (cm <sup>3</sup> /g) | 0.505 |
| V <sub>micro</sub> <sup>d</sup> (cm <sup>3</sup> /g) | 0.014 |
| P <sup>e</sup> (nm)                                  | 6.92  |

**a.** The surface area (S<sub>BET</sub>) calculated by the Brunauer-Emmett-Teller (BET) method.

**b** and **d.** The surface area (S<sub>micro</sub>) and volume (V<sub>micro</sub>) of micropore calculated by the t-plot equation.

**c.** The total pore volume calculated by the N<sub>2</sub> adsorption/desorption isotherm at P/P<sub>0</sub>=0.95.

**e.** The main pore size.

**Table S6** The LOD and LOQ value of individual detection and simultaneous detection of  $\text{Pb}^{2+}$  and  $\text{Cd}^{2+}$  on  $\text{Fe}_2\text{O}_3@\text{NCNPs-1.5}/\text{GCE}$ .

| Analyte                   |                  | LOD (nM) | LOQ (nM) |
|---------------------------|------------------|----------|----------|
| Individual<br>detection   | $\text{Pb}^{2+}$ | 27.45    | 94.47    |
|                           | $\text{Cd}^{2+}$ | 38.20    | 118.88   |
| Simultaneous<br>detection | $\text{Pb}^{2+}$ | 4.92     | 15.15    |
|                           | $\text{Cd}^{2+}$ | 18.79    | 61.75    |

**Table S7** Comparison of the electrochemical performance of individual detection and simultaneous detection of  $\text{Pb}^{2+}$  and  $\text{Cd}^{2+}$  on  $\text{Fe}_2\text{O}_3@\text{NCNPs-1.5}/\text{GCE}$  and  $\text{Fe}_2\text{O}_3$  NPs/GCE at the same testing conditions.

|                            |          | Analyte          | $\text{Fe}_2\text{O}_3$ NPs/GCE | $\text{Fe}_2\text{O}_3@\text{NCNPs-1.5}/\text{GCE}$ |
|----------------------------|----------|------------------|---------------------------------|-----------------------------------------------------|
| Simultaneous determination | LOD (nM) | $\text{Pb}^{2+}$ | 10.99                           | 4.92                                                |
|                            |          | $\text{Cd}^{2+}$ | 41.09                           | 18.79                                               |
| Individual determination   | LOD (nM) | $\text{Pb}^{2+}$ | 9.48                            | 27.45                                               |
|                            |          | $\text{Cd}^{2+}$ | 38.31                           | 38.20                                               |
